# Supplementary material
Source: publisher figshare collection journal article supplement (https://gsapubs.figshare.com/ndownloader/files/22410519)
Supplement: Supplementary file 1 [file 22410519]

## Sheet: Hvitserkur WR Hf isotope
REFERENCE1	LOCATION	SAMPLE NAME	MATERIAL	ANALYSIS DATE	STANDARDS7	Present day εHf values were calculated using the CHUR parameters reported by Bouvier et al. (2008)
						176Hf/177Hf	2σ	178Hf/177Hf	2σ	180Hf/177Hf	2σ	εHf	2σ	Note
Carley 2014.	Hvitserkur	IEHv-1c-1	Whole Rock	Spring 2013.	JMC-475 - Hf Reference Material (accepted 176Hf/177Hf = 0.282161); (Bilchert-Toft et al., 1997)	0.283212	4.55936	1.4672	23.1498	1.88733	33.282	15.0905	0.162834	normalized to standard plus error propagation

## Sheet: Standards
																																NORMALIZED TO STANDARD							NORMALIZED TO STANDARD-PLUS ERROR PROPAGATION
	Finnigan Hf Analyses													1.00005						0.999973		0.999908								1.00005	2.18809	0.999973	21.7236	0.999908	30.1942		176Hf/177Hf	2σ	178Hf/177Hf	2σ	180Hf/177Hf	2σ	εHf	2σ			NOTES
no	Date	Name	Type	Time	user	ratios	177 int, V	Neb	Conc, ppb	V/ppm	179/177		Beta	176/177						178/177		180/177			173Yb/177Hf		175Lu/177Hf			176/177		178/177		180/177			176/177		178/177		180/177				eps Hf	2SE
21	2013-03-11	IEHv-1c-1	REPLICATE	00:00:00	CF-VU	75	4.57	aridus	125	197.089	0.746929	5	-1.73325	0.283197	4	0.283211	8	15.0795	0.285714	1.46724	8	1.8875	14		8.11775e-08	1	5.54407e-08	1		0.283212	4	1.4672	8	1.88733	14		0.283212	4.55936	1.4672	23.1498	1.88733	33.282			15.0905	0.162834	n = 45; place as replicate to sample analyzed on 12-Mar-13
21	2013-03-12	IEHV-1c-1	Iceland	00:00:00	CF-VU	75	5.57	aridus	125	240.216	0.747527	5	-1.80438	0.2832	3	0.283216	6	15.236	0.214286	1.46725	5	1.8875	9		1.68e-06	1	3.83e-06	1		0.283215	3	1.46721	5	1.88733	9		0.283215	3.71319	1.46721	22.2916	1.88733	31.507			15.1902	0.132614
							JMC475 Day1		0.282146		1.46725		1.88689
									5.07669e-06		1.57469e-05		1.83741e-05
								corr factor	1.00005
							JMC 475 Day2		0.282144		1.46724		1.8869
									5.9125e-06		1.28641e-05		4.49994e-05
								corr factor	1.00006
							179Hf/177Hf true		0.7325
							mass 179Hf		178.946
							mass 177Hf		176.943
							CHUR
							0.282785	176Hf/177Hf
